# Supplementary material
Source: PubMed Central journal article supplement (PMC1904325)
Supplement: JCI0731721sd.pdf [file JCI0731721sd.pdf]

## Supplemental Figure 1. Caulin et al

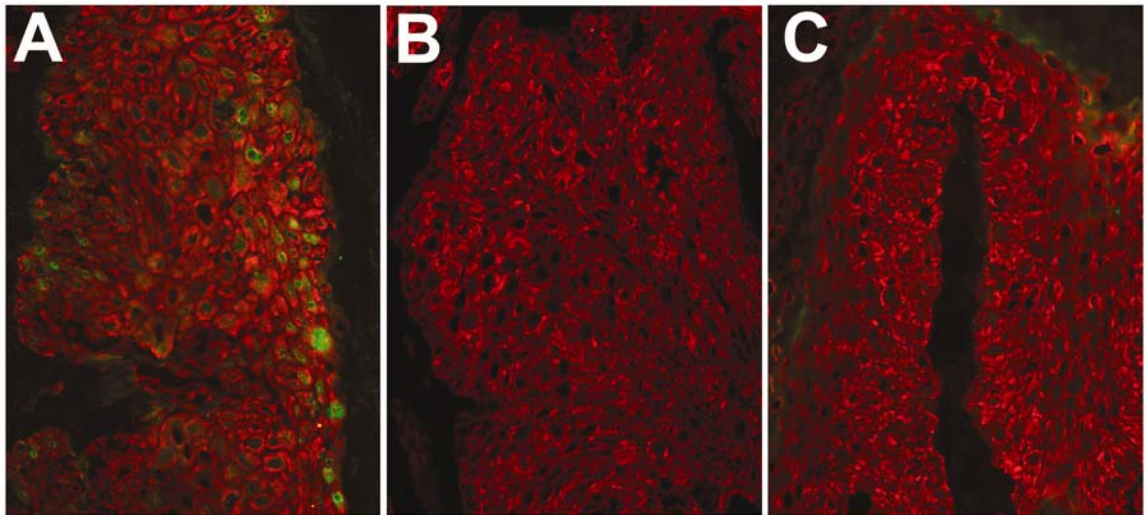

**Supplemental Figure 1:** Detection of p53<sup>R172H</sup> in tumors. Double immunofluorescence for p53 (green) and K14 (red) in tumors that developed in (A) Kras-p53<sup>R172H/f</sup>, (B) Kras-p53<sup>f/f</sup> and (C) Kras-p53<sup>wt/wt</sup> mice. Note that p53 is only detected in the nuclei of tumors that express the mutant p53<sup>R172H</sup>.

## Supplemental Figure 2. Caulin et al

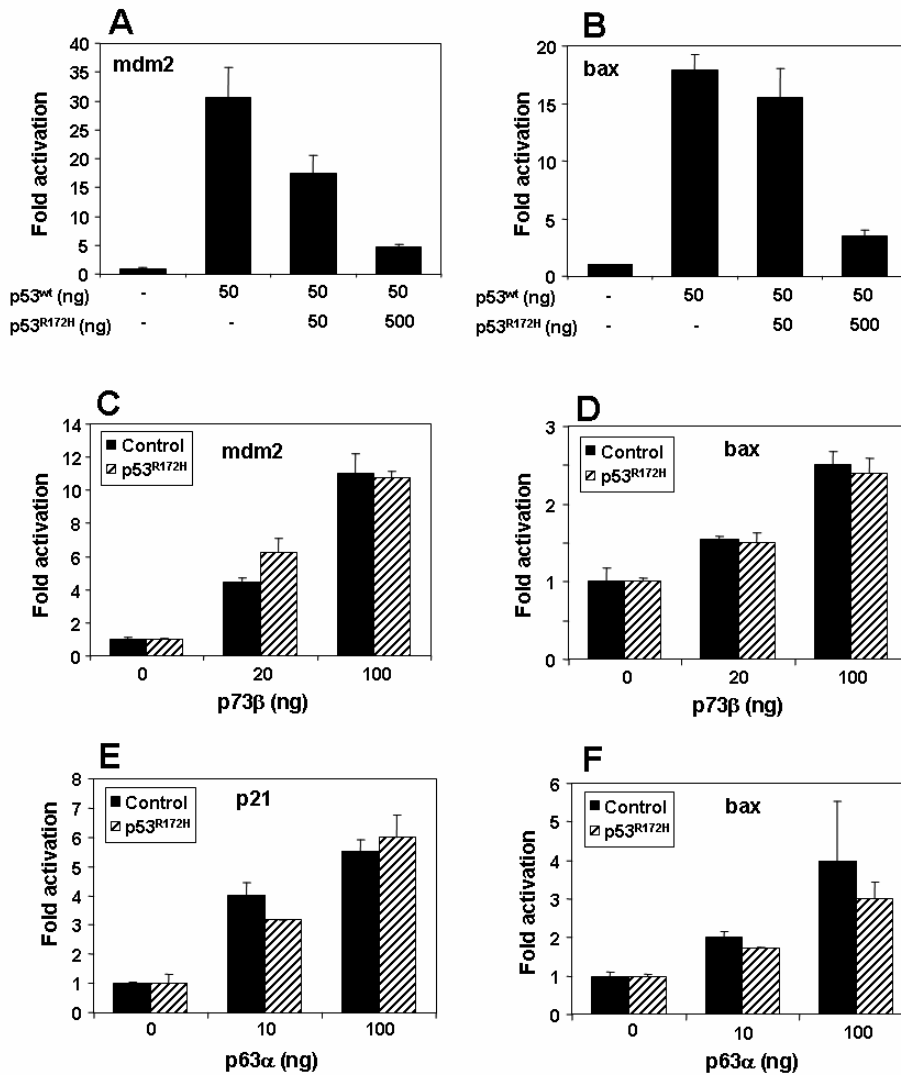

**Supplemental Figure 2: p53<sup>R172H</sup> does not modulate p63 and p73 transactivation in skin keratinocytes.** (A-B) p53-null keratinocytes were co-transfected with the indicated amounts of expression vectors for p53<sup>wt</sup> and/or p53<sup>R172H</sup>, luciferase reporter constructs carrying the bax or mdm2 promoters as indicated and a β-galactosidase reporter gene. Luciferase activity was normalized with β-galactosidase activity and results are expressed as fold increase relative to basal activity of the reporter genes in the absence of p53<sup>wt</sup> and p53<sup>R172H</sup>. Note that p53<sup>R172H</sup> inhibits the transactivation function of p53<sup>wt</sup>, consistent with a dominant negative effect. (C-F) Luciferase reporter assays with the bax, mdm2 or p21 promoters using increasing concentrations of expression vectors for p73β (C-D) or p63α (E-F), in the presence of 1 μg of the p53<sup>R172H</sup> vector or in the absence of p53<sup>R172H</sup> (Control). Note that the transactivation properties of p73β and p63α remain unchanged in the presence of p53<sup>R172H</sup>.
